# Supplementary material for: Benzodioxane–Benzamides as FtsZ Inhibitors: Effects of Linker’s Functionalization on Gram-Positive Antimicrobial Activity
Source: MDPI journal article supplement (doi:10.3390/antibiotics12121712), 2023-12-08
Supplement: s1 [file s1]

## Supporting Information:

# Benzodioxane-benzamides as FtsZ inhibitors: effects of linker's functionalization on Gram-positive antimicrobial activity.

Lorenzo Suigo, William Margolin, Eugenia Ulzurrun, Martina Hrast Rambaher, Carlo Zanotto, Victor Sebastián-Pérez, Nuria E. Campillo, Valentina Straniero\* and Ermanno Valoti

## Summary

|                                                                                                               |    |
|---------------------------------------------------------------------------------------------------------------|----|
| <b>Erythro 3-[1-(1,4-benzodioxan-2yl)ethyl-1-oxy]-2,6-difluorobenzamide (FZ104)</b> .....                     | 2  |
| <sup>1</sup> H-NMR (DMSO-d <sub>6</sub> ):.....                                                               | 2  |
| <sup>13</sup> C-NMR (DMSO-d <sub>6</sub> ):.....                                                              | 2  |
| HPLC:.....                                                                                                    | 3  |
| <b>Threo 3-[1-(1,4-benzodioxan-2yl)ethyl-1-oxy]-2,6-difluorobenzamide (FZ105)</b> .....                       | 4  |
| <sup>1</sup> H-NMR (DMSO-d <sub>6</sub> ):.....                                                               | 4  |
| <sup>13</sup> C-NMR (DMSO-d <sub>6</sub> ):.....                                                              | 4  |
| <b>Erythro 3-(2-(1,4-benzodioxan-2-yl)-1-propyloxy)-2,6-difluorobenzamide (FZ98)</b> .....                    | 6  |
| <sup>1</sup> H-NMR (DMSO-d <sub>6</sub> ):.....                                                               | 6  |
| <sup>13</sup> C-NMR (DMSO-d <sub>6</sub> ):.....                                                              | 6  |
| HPLC:.....                                                                                                    | 7  |
| <b>Threo 3-(2-(1,4-benzodioxan-2-yl)-1-propyloxy)-2,6-difluorobenzamide (FZ97)</b> .....                      | 8  |
| <sup>1</sup> H-NMR (DMSO-d <sub>6</sub> ):.....                                                               | 8  |
| <sup>13</sup> C-NMR (DMSO-d <sub>6</sub> ):.....                                                              | 8  |
| HPLC:.....                                                                                                    | 9  |
| <b>Erythro 3-(2-(5,6,7,8-Tetrahydro-1,4-naphthodioxan-2-yl)prop-1-yloxy)-2,6-difluorobenzamide (FZ118)</b> 10 |    |
| <sup>1</sup> H-NMR (DMSO-d <sub>6</sub> ):.....                                                               | 10 |
| <sup>13</sup> C-NMR (DMSO-d <sub>6</sub> ):.....                                                              | 10 |
| HPLC:.....                                                                                                    | 11 |
| <b>Threo 3-(2-(5,6,7,8-Tetrahydro-1,4-naphthodioxan-2-yl)prop-1-yloxy)-2,6-difluorobenzamide (FZ119)</b> ...  | 12 |
| <sup>1</sup> H-NMR (DMSO-d <sub>6</sub> ):.....                                                               | 12 |
| <sup>13</sup> C-NMR (DMSO-d <sub>6</sub> ):.....                                                              | 12 |
| HPLC:.....                                                                                                    | 13 |
| <b>Docking studies</b> .....                                                                                  | 14 |
| <b>Root-Mean-Square Deviation (RMSD)</b> .....                                                                | 15 |
| <b>IFD scores</b> .....                                                                                       | 16 |

# Erythro 3-[1-(1,4-benzodioxan-2-yl)ethyl-1-oxy]-2,6-difluorobenzamide (FZ104)

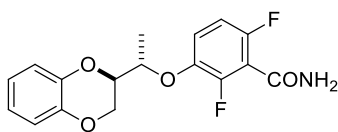

$^1\text{H-NMR}$  ( $\text{DMSO-d}_6$ ):

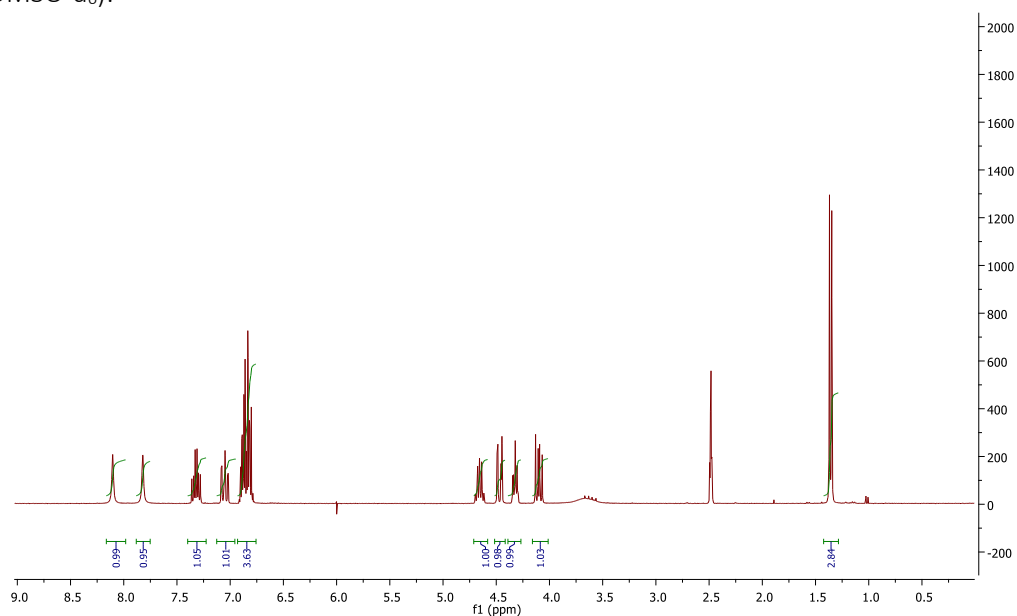

Figure S1:  $^1\text{H-NMR}$  spectrum of Compound FZ104

$^{13}\text{C-NMR}$  ( $\text{DMSO-d}_6$ ):

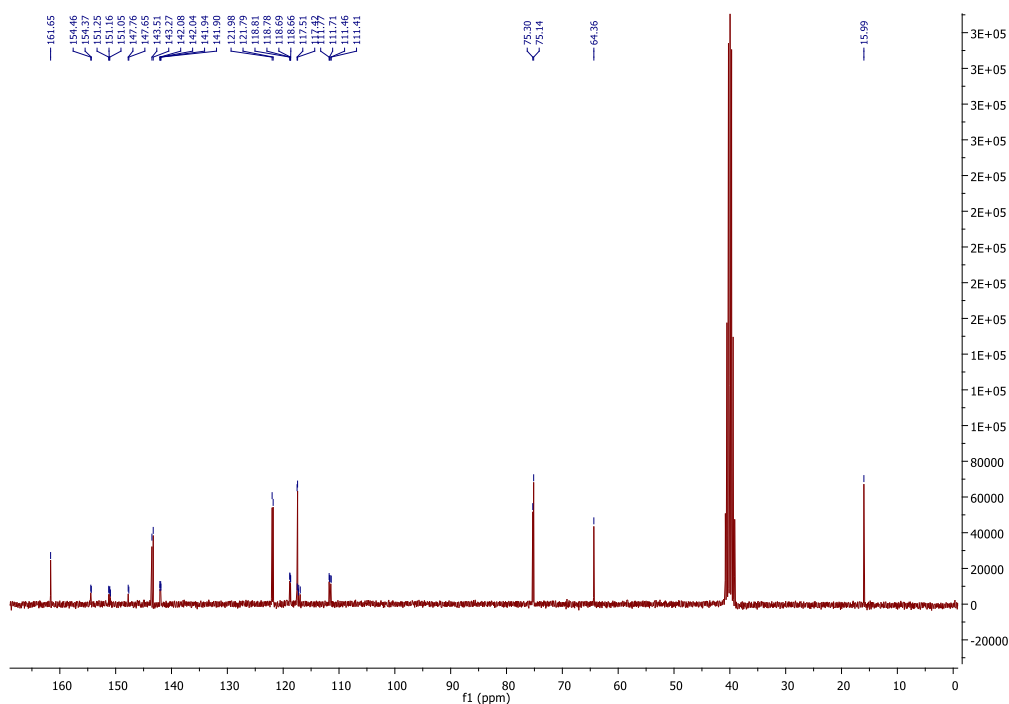

Figure S2:  $^{13}\text{C-NMR}$  spectrum of Compound FZ104

HPLC:

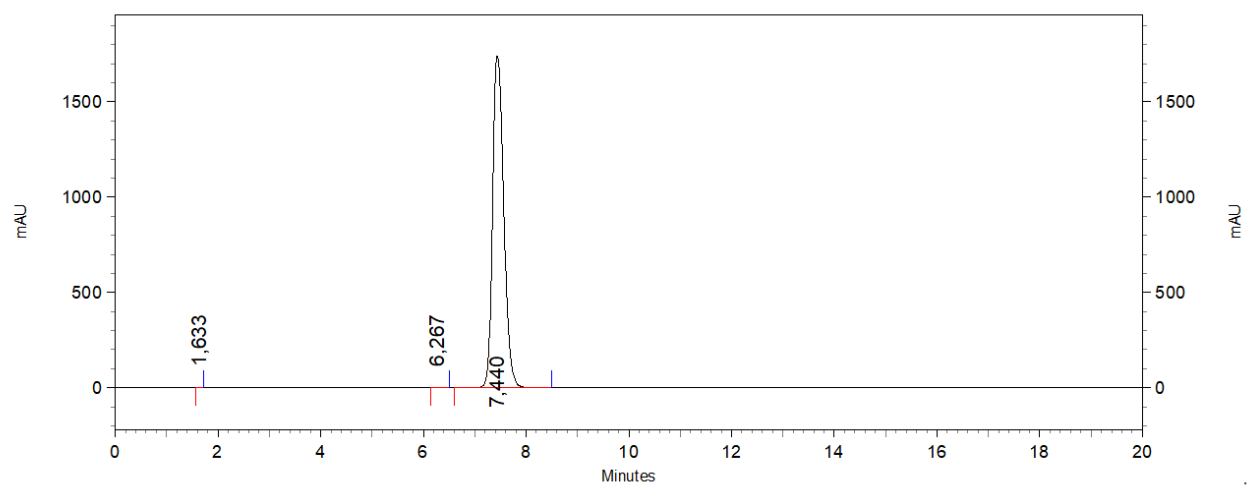

Figure S3: HPLC chromatogram of Compound FZ104

*Threo* 3-[1-(1,4-benzodioxan-2-yl)ethyl-1-oxy]-2,6-difluorobenzamide  
(FZ105)

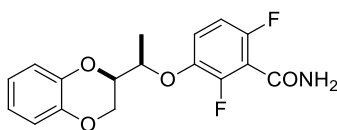

$^1\text{H-NMR}$  ( $\text{DMSO-d}_6$ ):

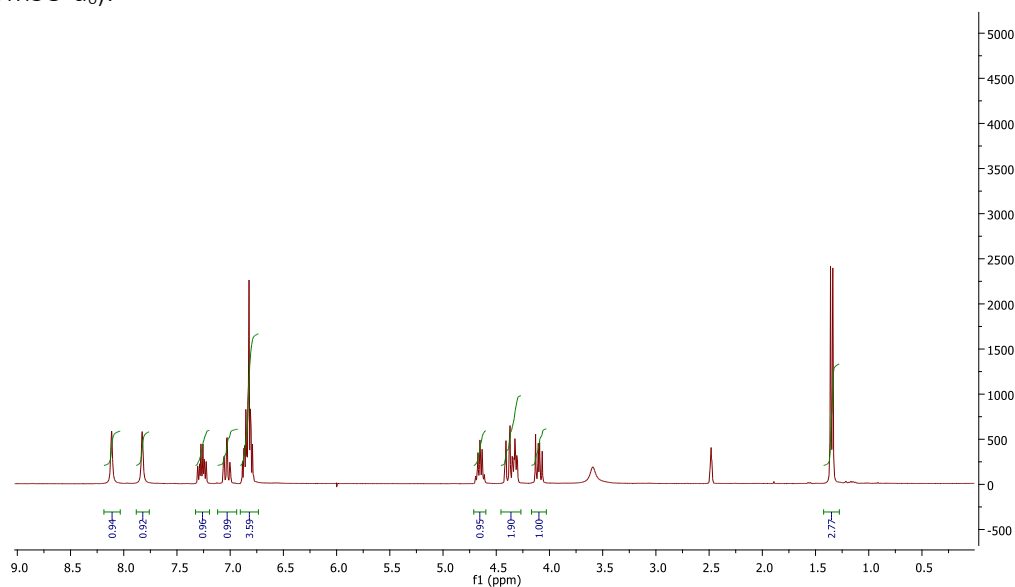

$^{13}\text{C-NMR}$  ( $\text{DMSO-d}_6$ ):

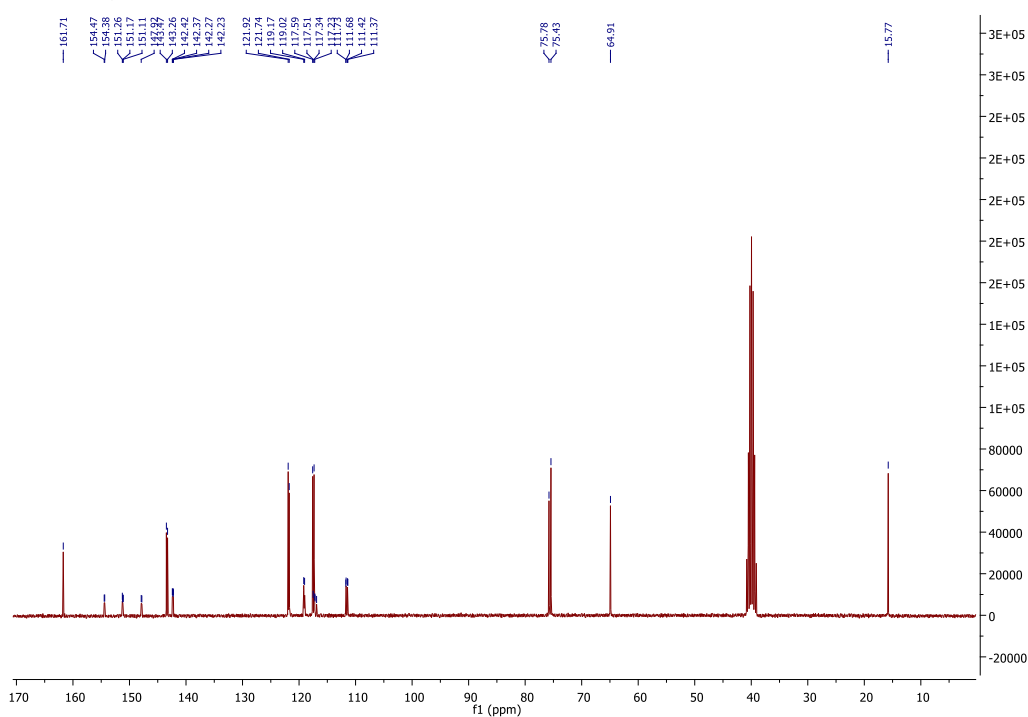

HPLC:

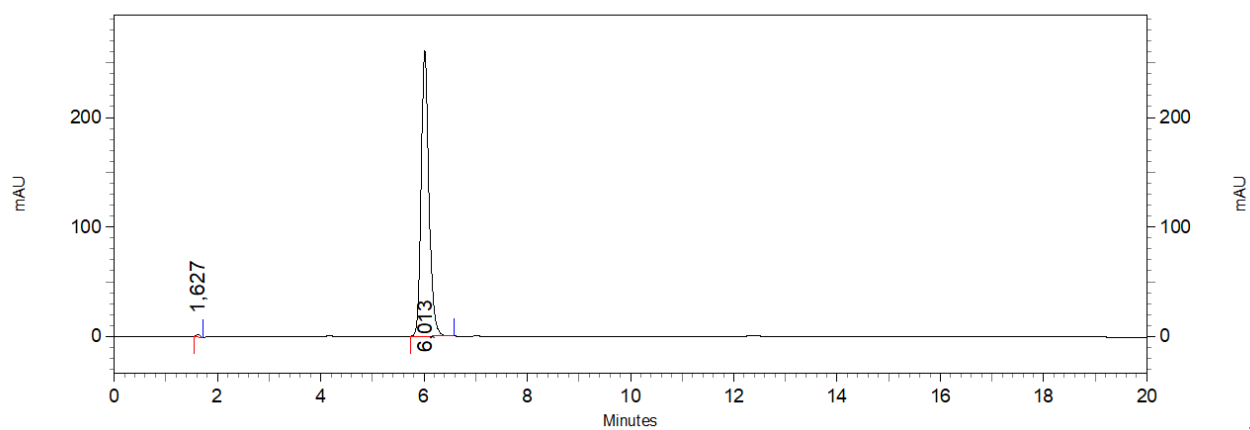

*Figure S6: HPLC chromatogram of Compound FZ105*

**Erythro 3-(2-(1,4-benzodioxan-2-yl)-1-propyloxy)-2,6-difluorobenzamide  
(FZ98)**

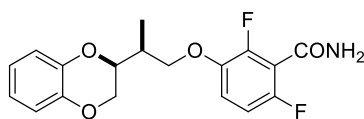

$^1\text{H-NMR}$  (DMSO- $d_6$ ):

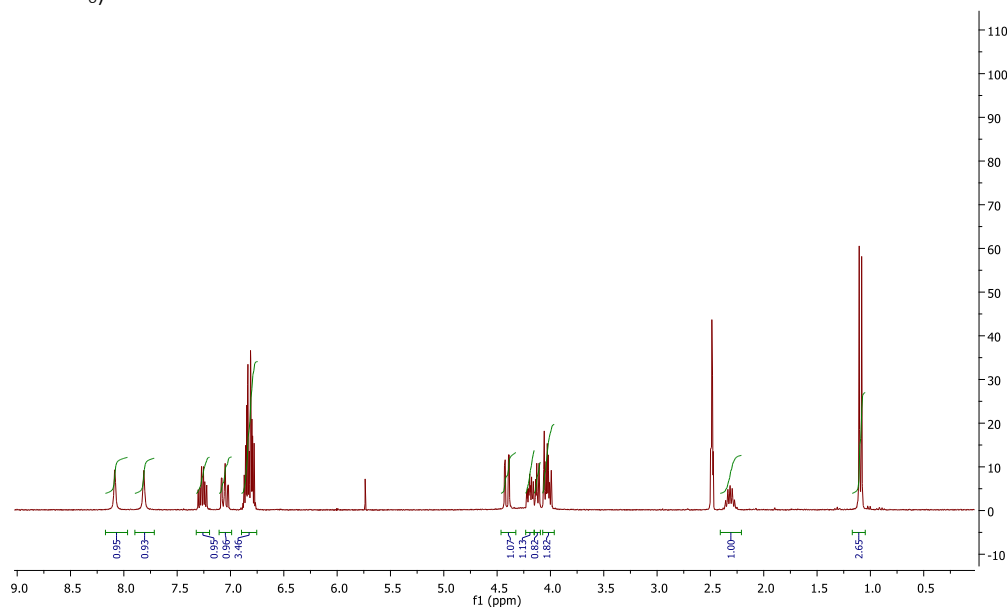

$^{13}\text{C-NMR}$  (DMSO- $d_6$ ):

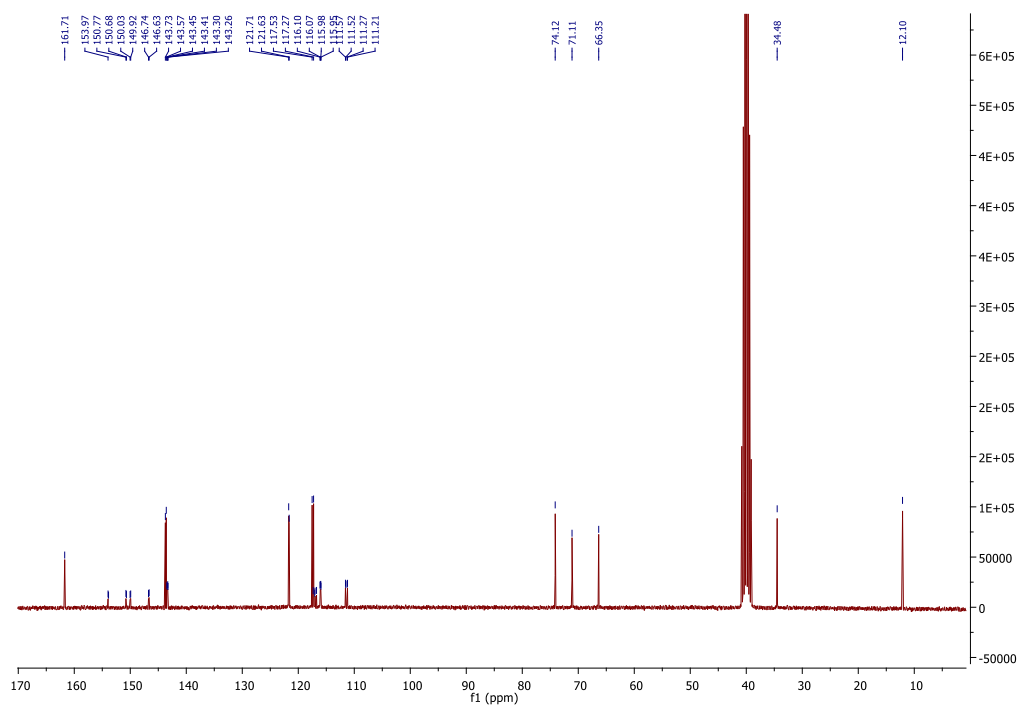

HPLC:

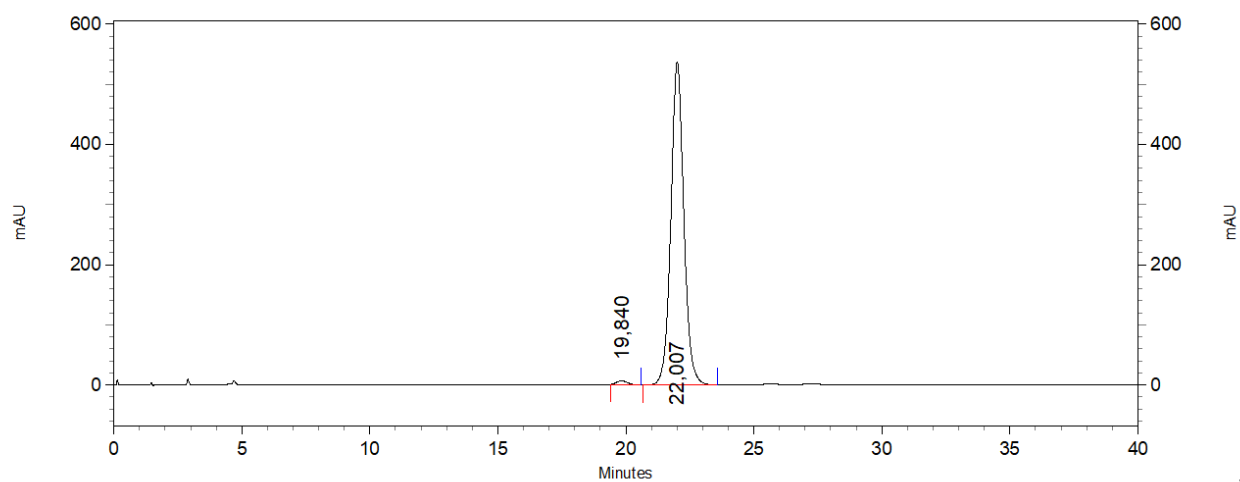

*Figure S9: HPLC chromatogram of Compound FZ98*

***Threo* 3-(2-(1,4-benzodioxan-2-yl)-1-propyloxy)-2,6-difluorobenzamide  
(FZ97)**

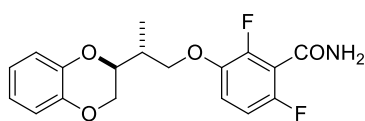

$^1\text{H-NMR}$  (DMSO- $\text{d}_6$ ):

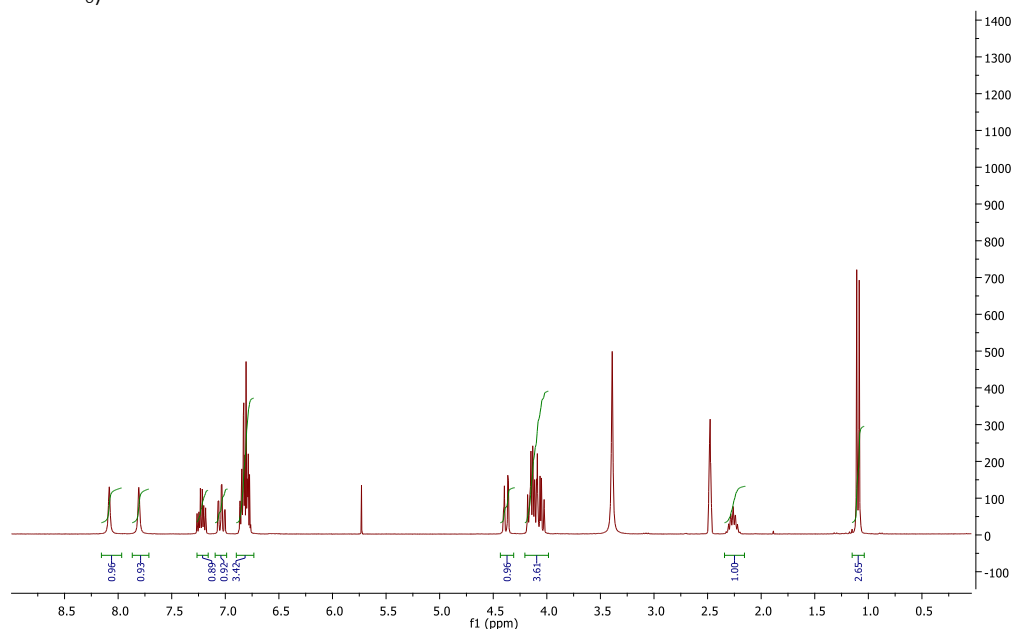

Figure S10:  $^1\text{H-NMR}$  spectrum of Compound FZ97

$^{13}\text{C-NMR}$  (DMSO- $\text{d}_6$ ):

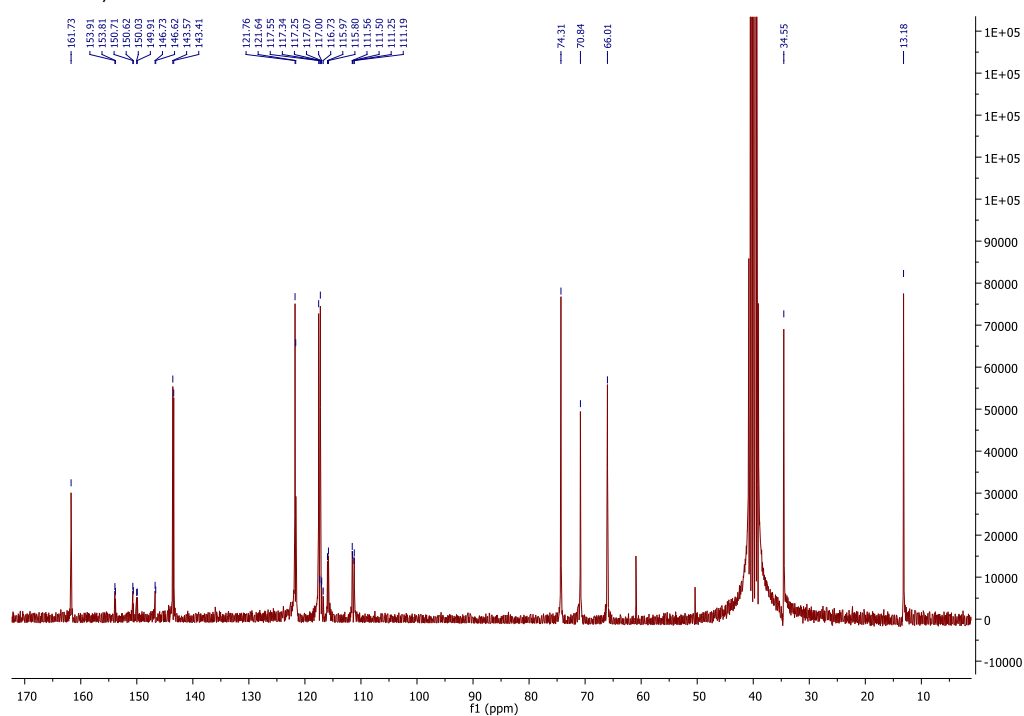

Figure S11:  $^{13}\text{C-NMR}$  spectrum of Compound FZ97



HPLC:

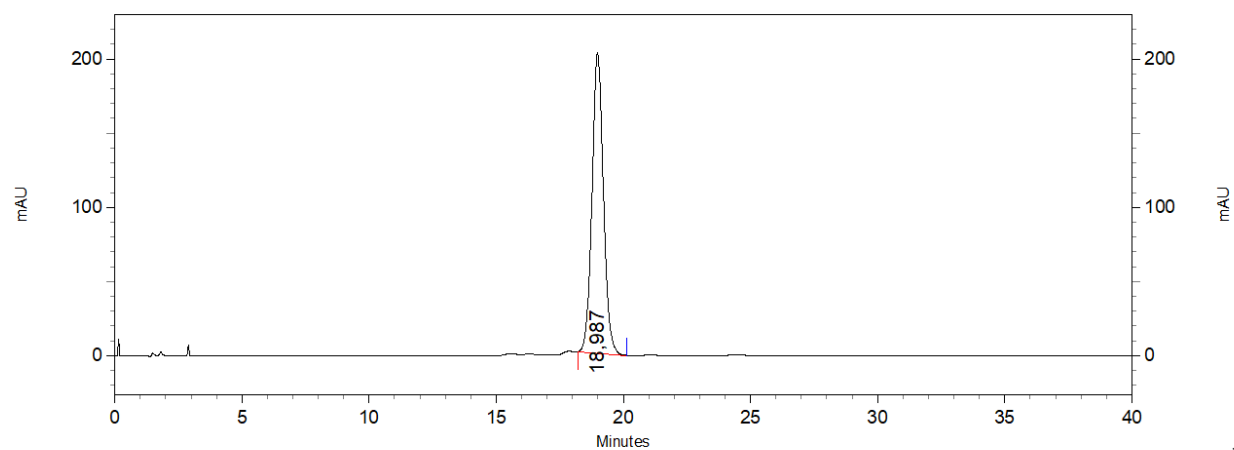

*Figure S12: HPLC chromatogram of Compound FZ97*

**Erythro 3-(2-(5,6,7,8-Tetrahydro-1,4-naphthodioxan-2-yl)prop-1-yloxy)-2,6-difluorobenzamide (FZ118)**

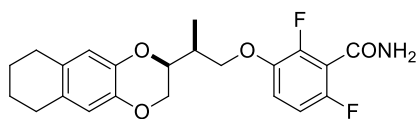

$^1\text{H-NMR}$  (DMSO- $\text{d}_6$ ):

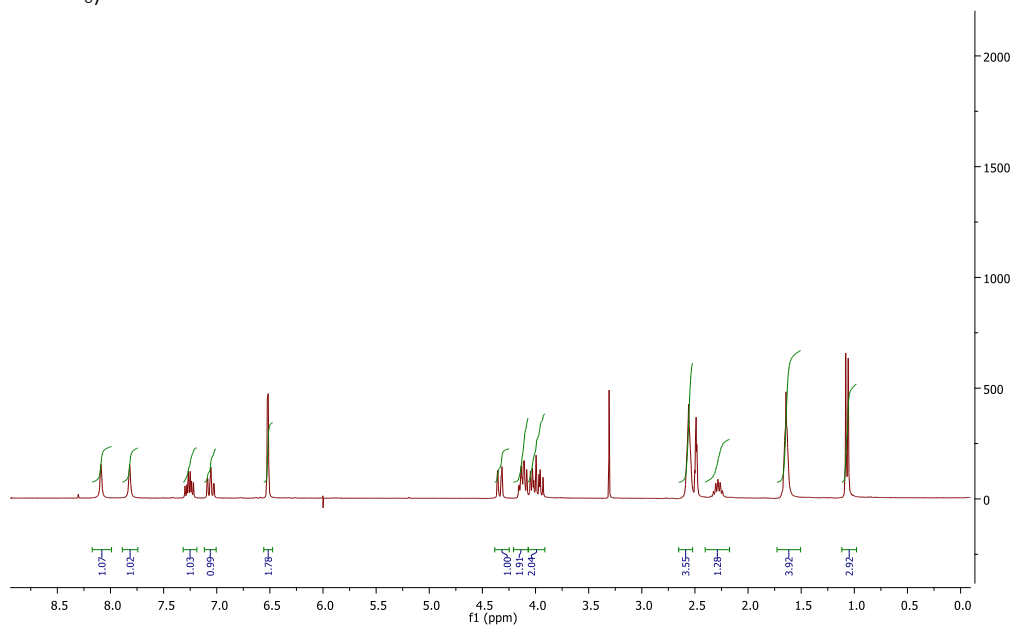

Figure S13:  $^1\text{H-NMR}$  spectrum of Compound FZ118

$^{13}\text{C-NMR}$  (DMSO- $\text{d}_6$ ):

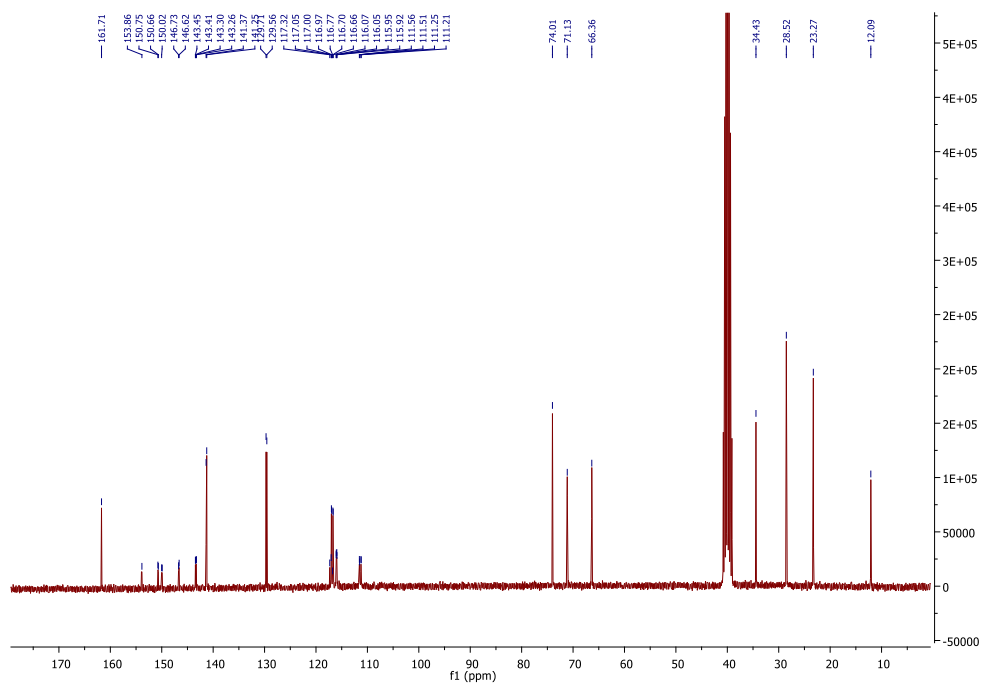

Figure S14:  $^{13}\text{C-NMR}$  spectrum of Compound FZ118

HPLC:

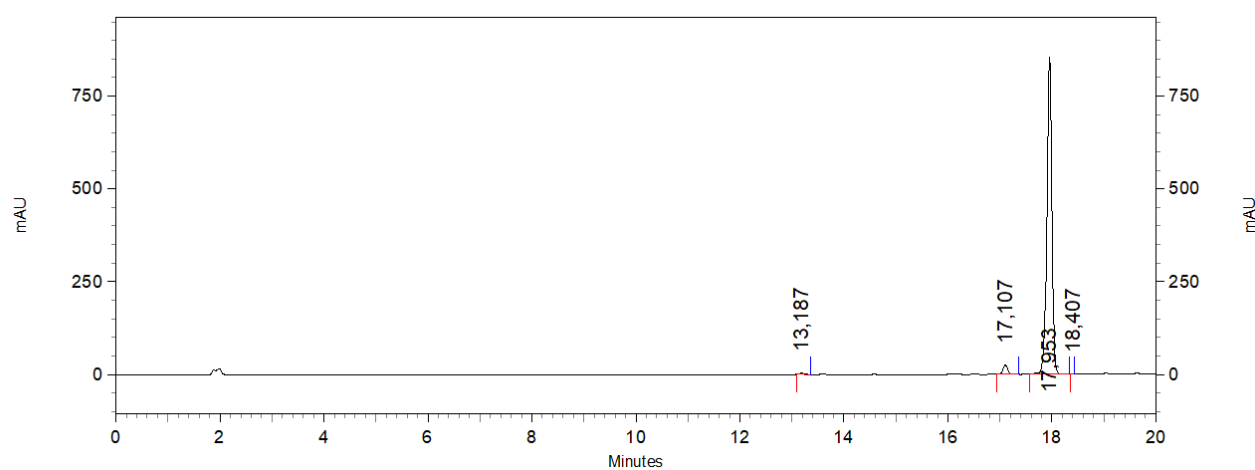

Figure S15: HPLC chromatogram of Compound FZ118

**Threo 3-(2-(5,6,7,8-Tetrahydro-1,4-naphthodioxan-2-yl)prop-1-yloxy)-2,6-difluorobenzamide (FZ119)**

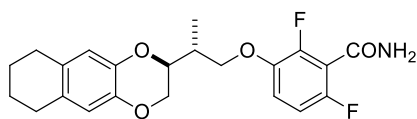

$^1\text{H-NMR}$  (DMSO- $d_6$ ):

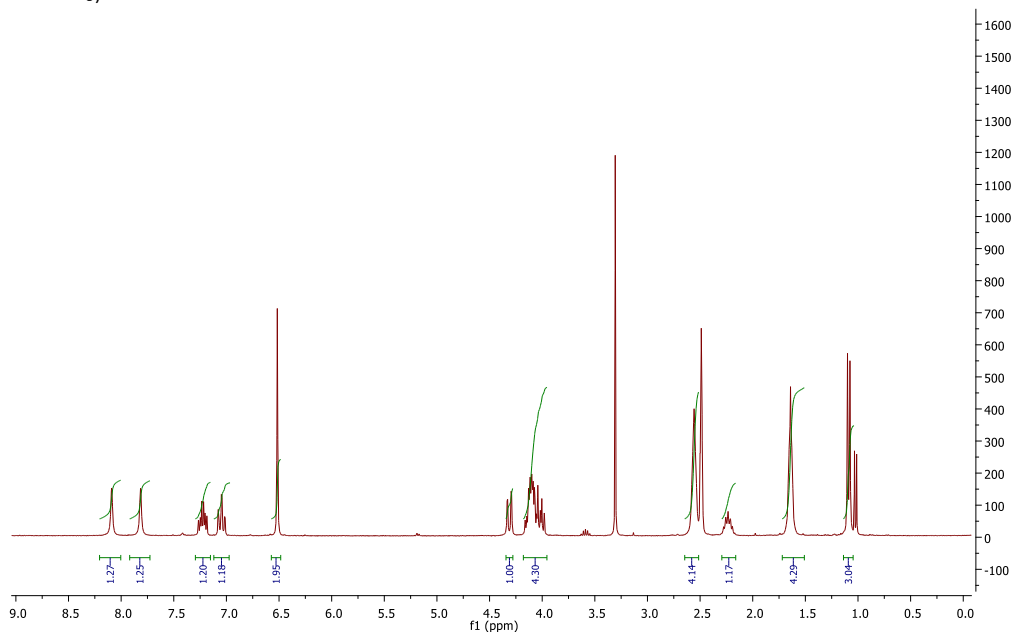

Figure S16:  $^1\text{H-NMR}$  spectrum of Compound FZ119

$^{13}\text{C-NMR}$  (DMSO- $d_6$ ):

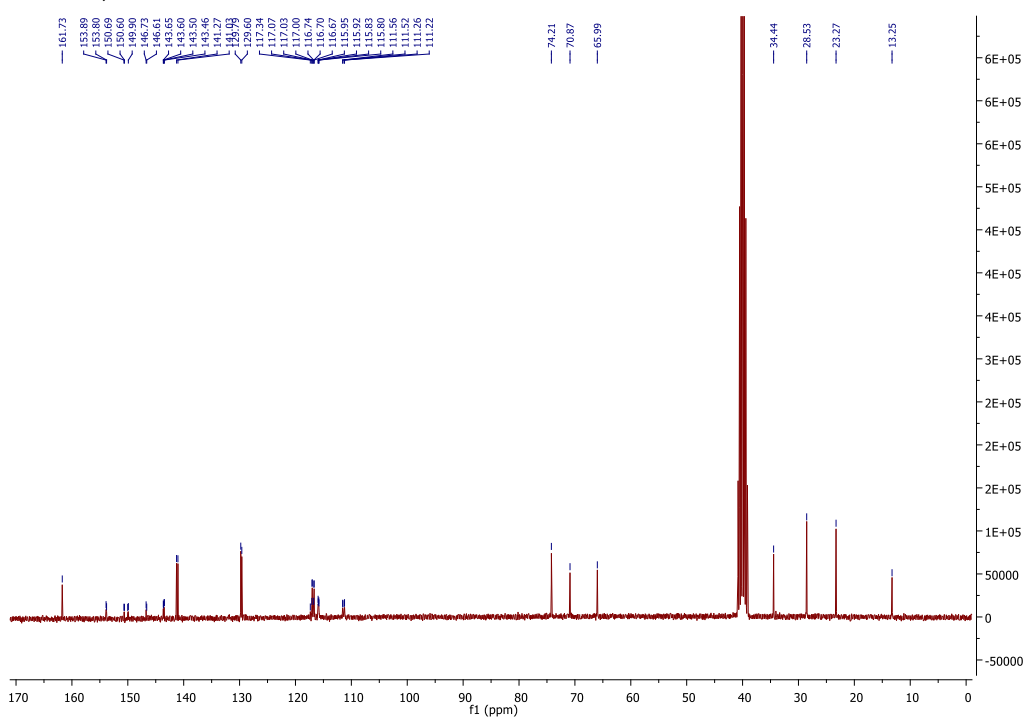

Figure S17:  $^{13}\text{C-NMR}$  spectrum of Compound FZ119

HPLC:

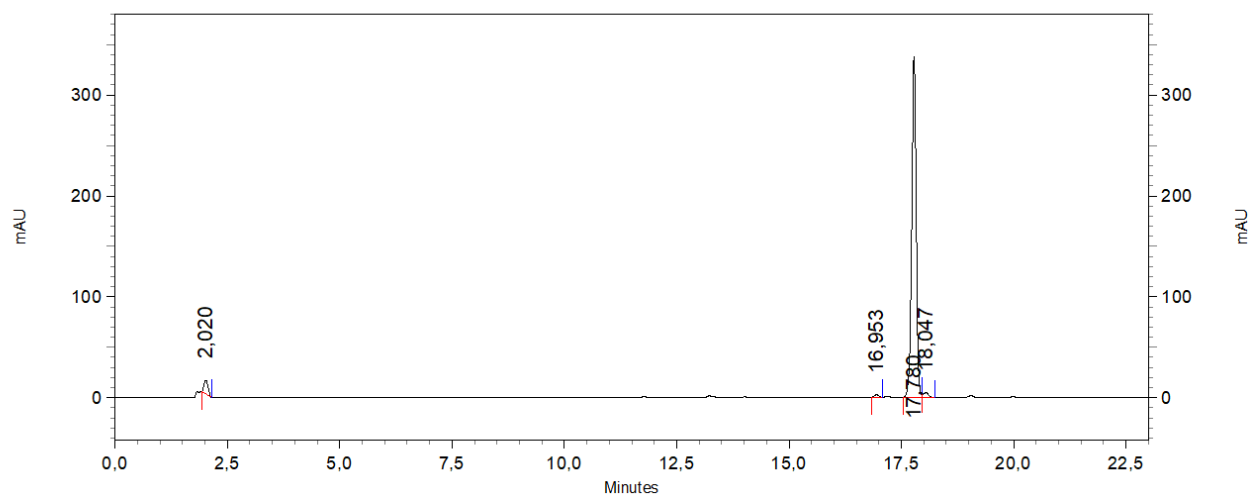

Figure S18: HPLC chromatogram of Compound FZ119

## Docking studies

Table S1: Docking range scores (\*kcal/ mol) of the new inhibitors (considering the best and the worst docking poses maintaining the three key hydrogen bonds), correlated to the relative antimicrobial activity towards *S. aureus*.

| Compound<br>(pose number) | Docking range<br>scores* | MIC vs <i>S. aureus</i><br>( $\mu$ M) | Compound<br>(pose number) | Docking range<br>scores* | MIC vs <i>S. aureus</i><br>( $\mu$ M) |
|---------------------------|--------------------------|---------------------------------------|---------------------------|--------------------------|---------------------------------------|
| FZ104_5'R (4)             | (-11.468, -8.607)        | 23.9                                  | FZ112_5'R (14)            | (-13.364, -10.932)       | 364.4                                 |
| FZ104_5'S (5)             | (-10.935, -9.614)        |                                       | FZ112_5'S (15)            | (-12.904, -9.683)        |                                       |
| FZ105_5'S (13)            | (-11.778, -8.269)        | 190.9                                 | FZ113_5'S (17)            | (-12.814, -10.783)       | 364.4                                 |
| FZ105_5'R (14)            | (-11.198, -9.519)        |                                       | FZ113_5'R (14)            | (-13.177, -10.887)       |                                       |
| FZ97_5'S (17)             | (-11.645, -10.710)       | 366.4                                 | FZ116_5'R (15)            | (-14.221, -10.870)       | 4.9                                   |
| FZ97_5'R (13)             | (-11.325, -9.555)        |                                       | FZ116_5'S (14)            | (-14.666, -12.334)       |                                       |
| FZ98_5'R (11)             | (-12.295, -10.552)       | 91.6                                  | FZ117_5'S (13)            | (-15.470, -11.972)       | 19.7                                  |
| FZ98_5'S (16)             | (-12.754, -10.250)       |                                       | FZ117_5'R (12)            | (-13.790, -11.048)       |                                       |
| FZ118_5'R (19)            | (-13.305, -11.611)       | 9.9                                   |                           |                          |                                       |
| FZ118_5'S (12)            | (-15.596, -11.541)       |                                       |                           |                          |                                       |
| FZ119_5'R (14)            | (-12.803, -11.386)       | 9.9                                   |                           |                          |                                       |
| FZ119_5'S (16)            | (-14.200, -11.170)       |                                       |                           |                          |                                       |

## Root-Mean-Square Deviation (RMSD)

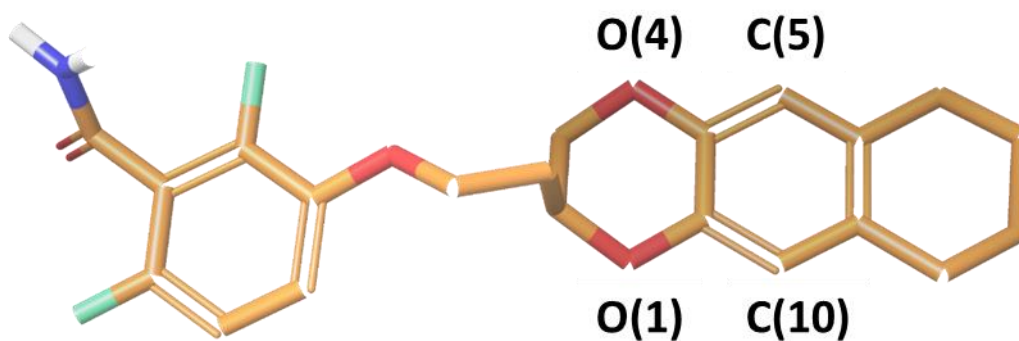

Figure S19: Legenda for O(1), O(4), C(5) and C(10) labeling, to calculate the RMSD in the superposition FZ100-novel compounds

Table S2: RMSD for atom pairs between O(1), O(4), C(5) and C(10) using FZ100 as reference structure

| Inhibitor Pose | RMSD O(4)<br>(Å) | RMSD O(1)<br>(Å) | RMSD C(5)<br>(Å) | RMSD C(10)<br>(Å) | 180° rotation |
|----------------|------------------|------------------|------------------|-------------------|---------------|
| 1_FZ104_R'S    | 0.883            | 0.865            | 0.773            | 0.807             | not           |
| 2_FZ116_R'S    | 0.515            | 0.148            | 0.572            | 0.256             | yes           |
| 7_FZ117_S'S    | 0.581            | 0.606            | 0.809            | 0.881             | yes           |
| 10_FZ117_S'S   | 0.744            | 0.917            | 0.36             | 0.847             | yes           |
| 2_FZ118_R'R    | 0.169            | 0.129            | 0.816            | 0.941             | yes           |
| 3_FZ119_R'S    | 0.332            | 0.384            | 0.530            | 0.557             | yes           |
| 4_FZ119_R'S    | 0.400            | 0.305            | 0.514            | 0.668             | yes           |

## IFD scores

Table S3

| Title       | docking score |            |         |             |         |
|-------------|---------------|------------|---------|-------------|---------|
| 1_FZ104_R'S | -10.935       | 3_FZ97_R'S | -11.063 | 4_FZ98_S'S  | -10.577 |
| 1_FZ104_R'S | -10.988       | 3_FZ97_R'S | -11.552 | 4_FZ98_S'S  | -10.25  |
| 1_FZ104_R'S | -10.985       | 3_FZ97_R'S | -11.298 | 5_FZ112_R'S | -12.904 |
| 1_FZ104_R'S | -10.294       | 3_FZ97_R'S | -11.347 | 5_FZ112_R'S | -13.132 |
| 1_FZ104_R'S | -9.614        | 3_FZ97_R'S | -10.87  | 5_FZ112_R'S | -12.821 |
| 1_FZ104_S'R | -11.468       | 3_FZ97_R'S | -10.924 | 5_FZ112_R'S | -12.788 |
| 1_FZ104_S'R | -10.571       | 3_FZ97_R'S | -10.945 | 5_FZ112_R'S | -12.105 |
| 1_FZ104_S'R | -9.293        | 3_FZ97_R'S | -10.185 | 5_FZ112_R'S | -12.268 |
| 1_FZ104_S'R | -8.607        | 3_FZ97_R'S | -10.71  | 5_FZ112_R'S | -11.986 |
| 2_FZ105_R'R | -11.198       | 3_FZ97_S'R | -11.325 | 5_FZ112_R'S | -12.135 |
| 2_FZ105_R'R | -11.378       | 3_FZ97_S'R | -11.25  | 5_FZ112_R'S | -11.681 |
| 2_FZ105_R'R | -10.998       | 3_FZ97_S'R | -10.745 | 5_FZ112_R'S | -11.826 |
| 2_FZ105_R'R | -10.72        | 3_FZ97_S'R | -11.164 | 5_FZ112_R'S | -11.057 |
| 2_FZ105_R'R | -10.701       | 3_FZ97_S'R | -10.889 | 5_FZ112_R'S | -10.773 |
| 2_FZ105_R'R | -11.009       | 3_FZ97_S'R | -11.762 | 5_FZ112_R'S | -10.39  |
| 2_FZ105_R'R | -11.298       | 3_FZ97_S'R | -10.88  | 5_FZ112_R'S | -10.312 |
| 2_FZ105_R'R | -10.548       | 3_FZ97_S'R | -11.236 | 5_FZ112_R'S | -9.683  |
| 2_FZ105_R'R | -10.42        | 3_FZ97_S'R | -11.125 | 5_FZ112_S'R | -13.364 |
| 2_FZ105_R'R | -10.59        | 3_FZ97_S'R | -11.136 | 5_FZ112_S'R | -13.738 |
| 2_FZ105_R'R | -10.78        | 3_FZ97_S'R | -11.039 | 5_FZ112_S'R | -12.656 |
| 2_FZ105_R'R | -10.661       | 3_FZ97_S'R | -10.823 | 5_FZ112_S'R | -12.474 |
| 2_FZ105_R'R | -10.172       | 3_FZ97_S'R | -9.555  | 5_FZ112_S'R | -13.215 |
| 2_FZ105_R'R | -9.519        | 4_FZ98_R'R | -12.295 | 5_FZ112_S'R | -11.885 |
| 2_FZ105_S'S | -11.778       | 4_FZ98_R'R | -12.051 | 5_FZ112_S'R | -12.884 |
| 2_FZ105_S'S | -11.254       | 4_FZ98_R'R | -12.181 | 5_FZ112_S'R | -12.383 |
| 2_FZ105_S'S | -10.863       | 4_FZ98_R'R | -12.072 | 5_FZ112_S'R | -11.897 |
| 2_FZ105_S'S | -10.693       | 4_FZ98_R'R | -11.59  | 5_FZ112_S'R | -11.879 |
| 2_FZ105_S'S | -10.352       | 4_FZ98_R'R | -11.63  | 5_FZ112_S'R | -11.073 |
| 2_FZ105_S'S | -11.348       | 4_FZ98_R'R | -11.021 | 5_FZ112_S'R | -11.236 |
| 2_FZ105_S'S | -10.381       | 4_FZ98_R'R | -11.307 | 5_FZ112_S'R | -10.903 |
| 2_FZ105_S'S | -9.818        | 4_FZ98_R'R | -11.022 | 5_FZ112_S'R | -10.932 |
| 2_FZ105_S'S | -10.122       | 4_FZ98_R'R | -10.863 | 6_FZ113_R'R | -13.177 |
| 2_FZ105_S'S | -9.208        | 4_FZ98_R'R | -10.552 | 6_FZ113_R'R | -13.212 |
| 2_FZ105_S'S | -9.951        | 4_FZ98_S'S | -12.754 | 6_FZ113_R'R | -12.148 |
| 2_FZ105_S'S | -9.315        | 4_FZ98_S'S | -11.747 | 6_FZ113_R'R | -12.877 |
| 2_FZ105_S'S | -8.269        | 4_FZ98_S'S | -11.661 | 6_FZ113_R'R | -13.413 |
| 3_FZ97_R'S  | -11.645       | 4_FZ98_S'S | -11.655 | 6_FZ113_R'R | -12.544 |
| 3_FZ97_R'S  | -11.446       | 4_FZ98_S'S | -12.197 | 6_FZ113_R'R | -12.31  |
| 3_FZ97_R'S  | -11.194       | 4_FZ98_S'S | -12     | 6_FZ113_R'R | -12     |
| 3_FZ97_R'S  | -11.631       | 4_FZ98_S'S | -10.641 | 6_FZ113_R'R | -11.694 |
| 3_FZ97_R'S  | -10.775       | 4_FZ98_S'S | -11.39  | 6_FZ113_R'R | -11.35  |
| 3_FZ97_R'S  | -11.139       | 4_FZ98_S'S | -11.01  | 6_FZ113_R'R | -11.336 |
| 3_FZ97_R'S  | -11.326       | 4_FZ98_S'S | -11.05  | 6_FZ113_R'R | -11.092 |
| 3_FZ97_R'S  | -10.719       | 4_FZ98_S'S | -10.705 | 6_FZ113_R'R | -10.675 |
|             |               | 4_FZ98_S'S | -10.632 | 6_FZ113_R'R | -10.887 |
|             |               | 4_FZ98_S'S | -10.445 | 6_FZ113_S'S | -12.814 |
|             |               | 4_FZ98_S'S | -10.767 | 6_FZ113_S'S | -11.957 |



|             |         |             |         |              |         |
|-------------|---------|-------------|---------|--------------|---------|
| 6_FZ113_S'S | -11.803 | 8_FZ117_R'R | -13.79  | 9_FZ118_S'S  | -15.596 |
| 6_FZ113_S'S | -13.147 | 8_FZ117_R'R | -13.941 | 9_FZ118_S'S  | -13.581 |
| 6_FZ113_S'S | -12.217 | 8_FZ117_R'R | -13.863 | 9_FZ118_S'S  | -14.049 |
| 6_FZ113_S'S | -11.752 | 8_FZ117_R'R | -14.278 | 9_FZ118_S'S  | -13.534 |
| 6_FZ113_S'S | -11.621 | 8_FZ117_R'R | -14.045 | 9_FZ118_S'S  | -13.213 |
| 6_FZ113_S'S | -11.8   | 8_FZ117_R'R | -13.667 | 9_FZ118_S'S  | -12.668 |
| 6_FZ113_S'S | -11.749 | 8_FZ117_R'R | -13.425 | 9_FZ118_S'S  | -12.475 |
| 6_FZ113_S'S | -11.598 | 8_FZ117_R'R | -13.471 | 9_FZ118_S'S  | -12.303 |
| 6_FZ113_S'S | -11.583 | 8_FZ117_R'R | -13.021 | 9_FZ118_S'S  | -12.371 |
| 6_FZ113_S'S | -11.634 | 8_FZ117_R'R | -12.784 | 9_FZ118_S'S  | -12.316 |
| 6_FZ113_S'S | -11.393 | 8_FZ117_R'R | -12.525 | 9_FZ118_S'S  | -11.804 |
| 6_FZ113_S'S | -11.551 | 8_FZ117_R'R | -11.048 | 9_FZ118_S'S  | -11.541 |
| 6_FZ113_S'S | -11.406 | 8_FZ117_S'S | -15.47  | 10_FZ119_R'S | -12.803 |
| 6_FZ113_S'S | -11.501 | 8_FZ117_S'S | -14.841 | 10_FZ119_R'S | -12.656 |
| 6_FZ113_S'S | -10.783 | 8_FZ117_S'S | -14.968 | 10_FZ119_R'S | -13.023 |
| 7_FZ116_R'S | -14.666 | 8_FZ117_S'S | -13.518 | 10_FZ119_R'S | -12.869 |
| 7_FZ116_R'S | -14.631 | 8_FZ117_S'S | -13.303 | 10_FZ119_R'S | -13.176 |
| 7_FZ116_R'S | -14.165 | 8_FZ117_S'S | -13.605 | 10_FZ119_R'S | -12.827 |
| 7_FZ116_R'S | -13.899 | 8_FZ117_S'S | -13.438 | 10_FZ119_R'S | -12.429 |
| 7_FZ116_R'S | -13.926 | 8_FZ117_S'S | -13.559 | 10_FZ119_R'S | -12.698 |
| 7_FZ116_R'S | -12.833 | 8_FZ117_S'S | -12.733 | 10_FZ119_R'S | -12.44  |
| 7_FZ116_R'S | -13.598 | 8_FZ117_S'S | -12.537 | 10_FZ119_R'S | -12.558 |
| 7_FZ116_R'S | -13.678 | 8_FZ117_S'S | -12.415 | 10_FZ119_R'S | -12.27  |
| 7_FZ116_R'S | -13.823 | 8_FZ117_S'S | -12.191 | 10_FZ119_R'S | -12.517 |
| 7_FZ116_R'S | -13.366 | 8_FZ117_S'S | -11.972 | 10_FZ119_R'S | -11.913 |
| 7_FZ116_R'S | -12.694 | 9_FZ118_R'R | -13.305 | 10_FZ119_R'S | -11.386 |
| 7_FZ116_R'S | -12.896 | 9_FZ118_R'R | -12.865 | 10_FZ119_S'R | -14.2   |
| 7_FZ116_R'S | -13.312 | 9_FZ118_R'R | -13.127 | 10_FZ119_S'R | -13.369 |
| 7_FZ116_R'S | -12.334 | 9_FZ118_R'R | -13.32  | 10_FZ119_S'R | -13.256 |
| 7_FZ116_S'R | -14.221 | 9_FZ118_R'R | -13.584 | 10_FZ119_S'R | -13.533 |
| 7_FZ116_S'R | -13.397 | 9_FZ118_R'R | -12.741 | 10_FZ119_S'R | -13.357 |
| 7_FZ116_S'R | -13.12  | 9_FZ118_R'R | -13.254 | 10_FZ119_S'R | -13.32  |
| 7_FZ116_S'R | -13.38  | 9_FZ118_R'R | -12.9   | 10_FZ119_S'R | -13.396 |
| 7_FZ116_S'R | -13.506 | 9_FZ118_R'R | -13.026 | 10_FZ119_S'R | -13.411 |
| 7_FZ116_S'R | -13.383 | 9_FZ118_R'R | -12.777 | 10_FZ119_S'R | -13.012 |
| 7_FZ116_S'R | -12.29  | 9_FZ118_R'R | -12.697 | 10_FZ119_S'R | -12.475 |
| 7_FZ116_S'R | -12.791 | 9_FZ118_R'R | -11.861 | 10_FZ119_S'R | -12.478 |
| 7_FZ116_S'R | -13.289 | 9_FZ118_R'R | -12.418 | 10_FZ119_S'R | -12.541 |
| 7_FZ116_S'R | -12.848 | 9_FZ118_R'R | -12.093 | 10_FZ119_S'R | -12.885 |
| 7_FZ116_S'R | -12.773 | 9_FZ118_R'R | -12.328 | 10_FZ119_S'R | -12.368 |
| 7_FZ116_S'R | -12.308 | 9_FZ118_R'R | -11.838 | 10_FZ119_S'R | -12.87  |
| 7_FZ116_S'R | -11.716 | 9_FZ118_R'R | -12.286 | 10_FZ119_S'R | -11.17  |
| 7_FZ116_S'R | -11.338 | 9_FZ118_R'R | -11.572 |              |         |
| 7_FZ116_S'R | -10.87  | 9_FZ118_R'R | -11.611 |              |         |
